# Supplementary material
Source: PubMed Central journal article supplement (PMC5798285)
Supplement: supp_RA117.000125_132666_2_supp_36602_p0smr3.pdf [file supp_RA117.000125_132666_2_supp_36602_p0smr3.pdf]

## SUPPLEMENTARY DATA FOR

### Mechanism of bacterial membrane permeabilization of crotalicidin (Ctn) and its fragment Ctn[15-34], antimicrobial peptides from rattlesnake venom

Clara Pérez-Peinado<sup>1</sup>, Susana Almeida Dias<sup>2</sup>, Marco M. Domingues<sup>2</sup>, Aurélie H. Benfield<sup>3</sup>, João Miguel Freire<sup>2,4</sup>, Gandhi Rádis-Baptista<sup>1,5</sup>, Diana Gaspar<sup>2</sup>, Miguel A. R. B. Castanho<sup>2</sup>, David J. Craik<sup>3</sup>, Sónia Troeira Henriques<sup>\*3</sup>, Ana Salomé Veiga<sup>\*2</sup>, David Andreu<sup>\*1</sup>

**FIGURE S1. Analytical reverse-phase HPLC chromatograms and ESI-MS spectra of peptides used in this study.** **a)** Analytical reverse-phase HPLC chromatograms before (dotted line) and after (continuous line) purification of synthetic peptides. Specific linear gradients of solvent B (0.036 % TFA in ACN) into A (0.045 % TFA in H<sub>2</sub>O) used for each peptide are shown over each chromatogram. **b)** ESI-MS spectra of pure peptides.

**FIGURE S2. Bacterial cells viability and membrane permeabilization of *E. coli* upon treatment with RhB-Ctn and RhB-Ctn[15-34].**  $5 \times 10^5$  CFU/mL *E. coli* suspensions were incubated with increasing peptide concentrations of RhB-Ctn (red, top) or RhB-Ctn[15-34] (blue, bottom). Negative (live bacteria) and positive (dead bacteria) controls without peptide or incubated with 70 % (v/v) isopropanol are represented in black and grey, respectively. **a)** Histograms on the SYTOX® Green channel detected by flow cytometry. **b)** Histograms on the Rhodamine B channel detected by flow cytometry. **c)** Percentage of permeabilized bacteria (solid lines) and percentage of peptide uptake (discontinuous lines). Data correspond to mean  $\pm$  SD of three independent experiments.

**FIGURE S3. Distribution of residuals over time.** The deviation of the experimental data on Figures 4c and S3c from the two-state model is represented as residuals plots. **a)** Residuals plots of bacteria permeabilization for unlabeled Ctn (red) and Ctn[15-34] (blue). **b)** Residuals plots of bacteria permeabilization for RhB-Ctn (red) and RhB-Ctn[15-34] (blue).

**FIGURE S4. Time-resolved bacterial membrane permeabilization and peptide uptake.** RhB-Ctn (red) or RhB-Ctn[15-34] (blue) at their MBC were added to  $10^7$  CFU/mL *E. coli* suspensions. Changes on the SYTOX® Green and RhB gates were monitored during 90 min immediately after the peptides addition. **a)** Flow cytometry correlograms at different time points in the presence of RhB-labeled peptides.  $P_n$  and  $U_n$  are the percentages of permeabilized bacteria and peptide uptake at each time interval (n) (seg). **b)** Flow cytometry dot plots for the negative (live bacteria) and positive (dead bacteria) controls. **c)** Percentages of permeabilized bacteria (dark colour) and percentages of peptide uptake (light colour). Percentages of permeabilized bacteria were fitted to the two-state model (1) (solid line) as described in the experimental section.

**FIGURE S5. Confocal point scanning microscopy images of *E. coli* upon treatment with Ctn and Ctn[15-34], as well as the RhB-labelled versions.** *E. coli* suspensions at  $10^7$  FU /mL were incubated with peptides at their MBC. The fluorescence emission intensity of RhB (red signal) allows to detect the peptides distribution. Fluorescence emission intensity of SYTOX® Green (green signal) allows to detect bacterial membrane permeabilization. Transmitted light images are also shown.

**FIGURE S6. Effect of RhB-label in the membrane binding affinity of Ctn[15-34] as followed by SPR.** **a)** Dose response curves obtained with Ctn[15-34] or RhB-Ctn[15-34] over POPC or POPC/POPS (80:20) model membranes deposited onto L1 chip. **b)** Sensorgrams obtained with 64  $\mu$ M of peptide injected over POPC or POPC/POPS (80:20).

55 **FIGURE S7. Time-dependent POPC/POPS (80:20) disruptive effect of Ctn[15-34] and**  
56 **RhB-Ctn[15-34].** Percentage of membrane leakage at 5, 10 and 15 min was determined by CF  
57 dequenching. LUVs composed with POPC/POPS (80:20) with total lipid concentration of 5  $\mu$ M  
58 was incubated with various concentrations of peptide and measurements were acquired at  
59 specific time points.

60  
61 **FIGURE S8. Time-resolved membrane permeabilization. a)** Linear calibration curve for the  
62 % of permeabilized bacteria, obtained using known percentages of live and dead bacteria. **b)**  
63 The kinetic curve for the untreated control demonstrate that bacteria remain alive during the  
64 whole acquisition and the changes observed on figure 4c are due to the peptide activity.

65  
66 **MOVIE S1a.** Changes on the SYTOX® Green fluorescence intensity after Ctn addition.

67  
68 **MOVIE S1b.** Changes on the SYTOX® Green fluorescence intensity after Ctn[15-34]  
69 addition.

70  
71 **MOVIE S2a.** Changes on the SYTOX® Green and RhB fluorescence intensity after RhB-Ctn  
72 addition.

73  
74 **MOVIE S2b.** Changes on the SYTOX® Green and RhB fluorescence intensity after RhB-  
75 Ctn[15-34] addition.

76  
77

78

## FIGURE S1

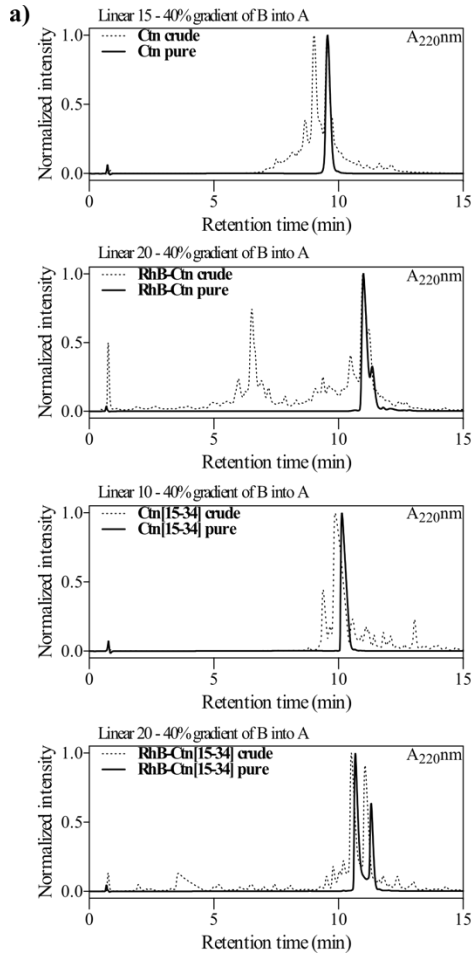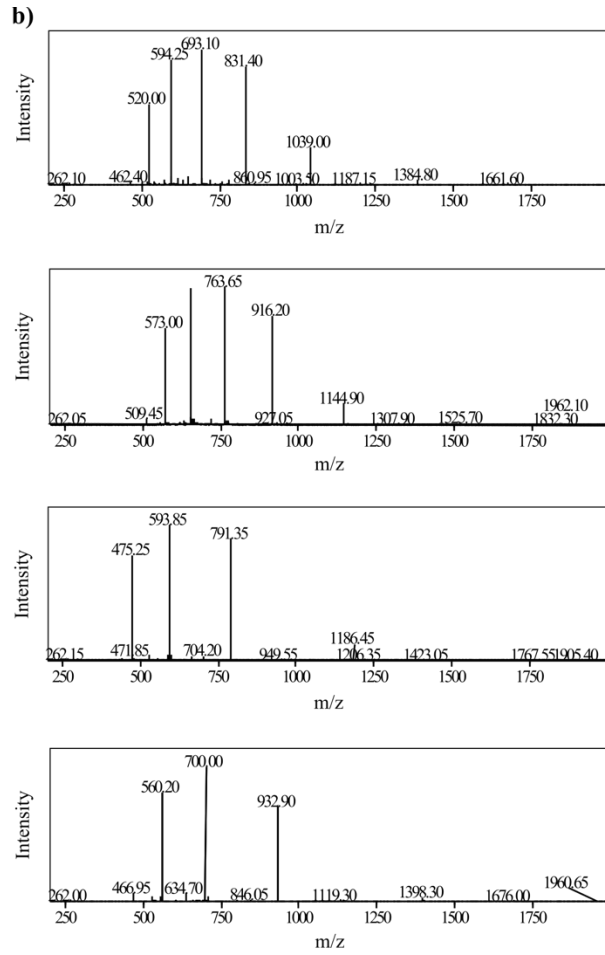79  
80  
81

82

FIGURE S2

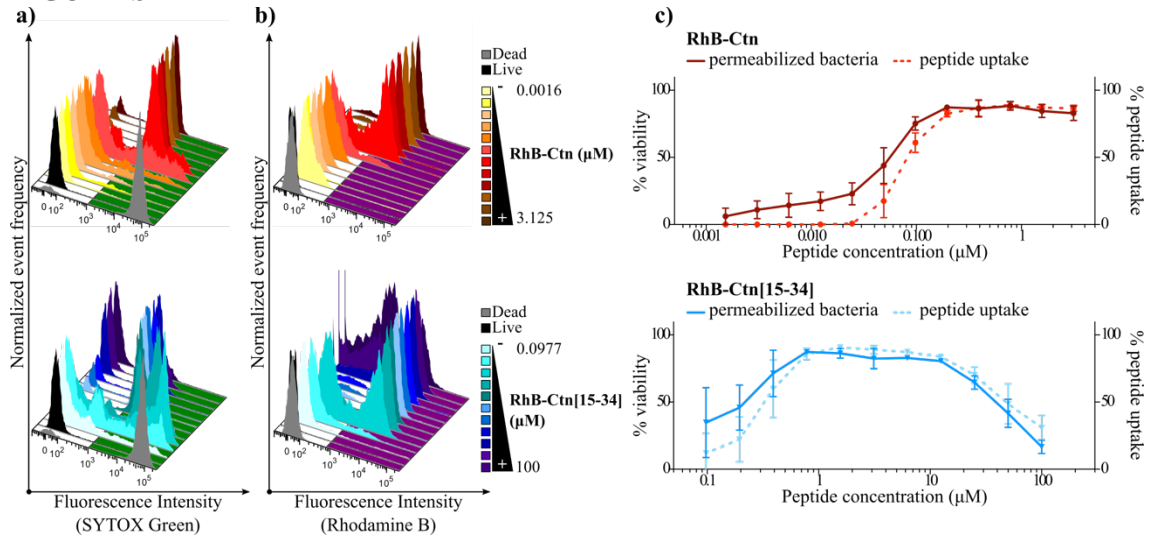

83

84

85

86 **FIGURE S3**  
a)

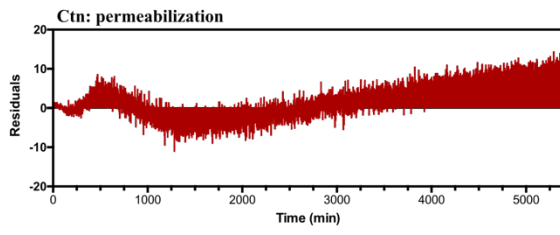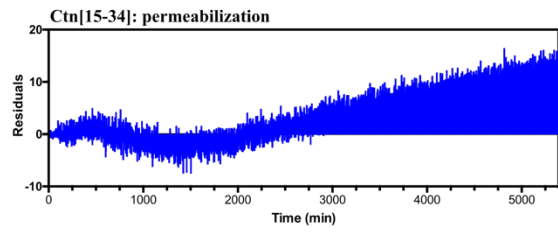

b)

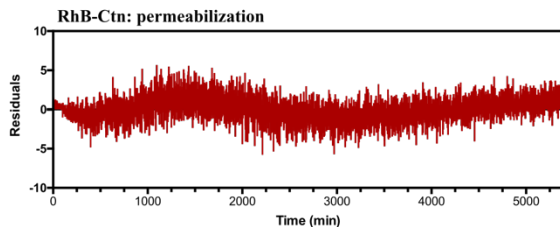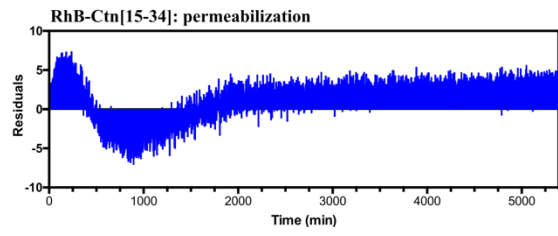

**FIGURE S4**

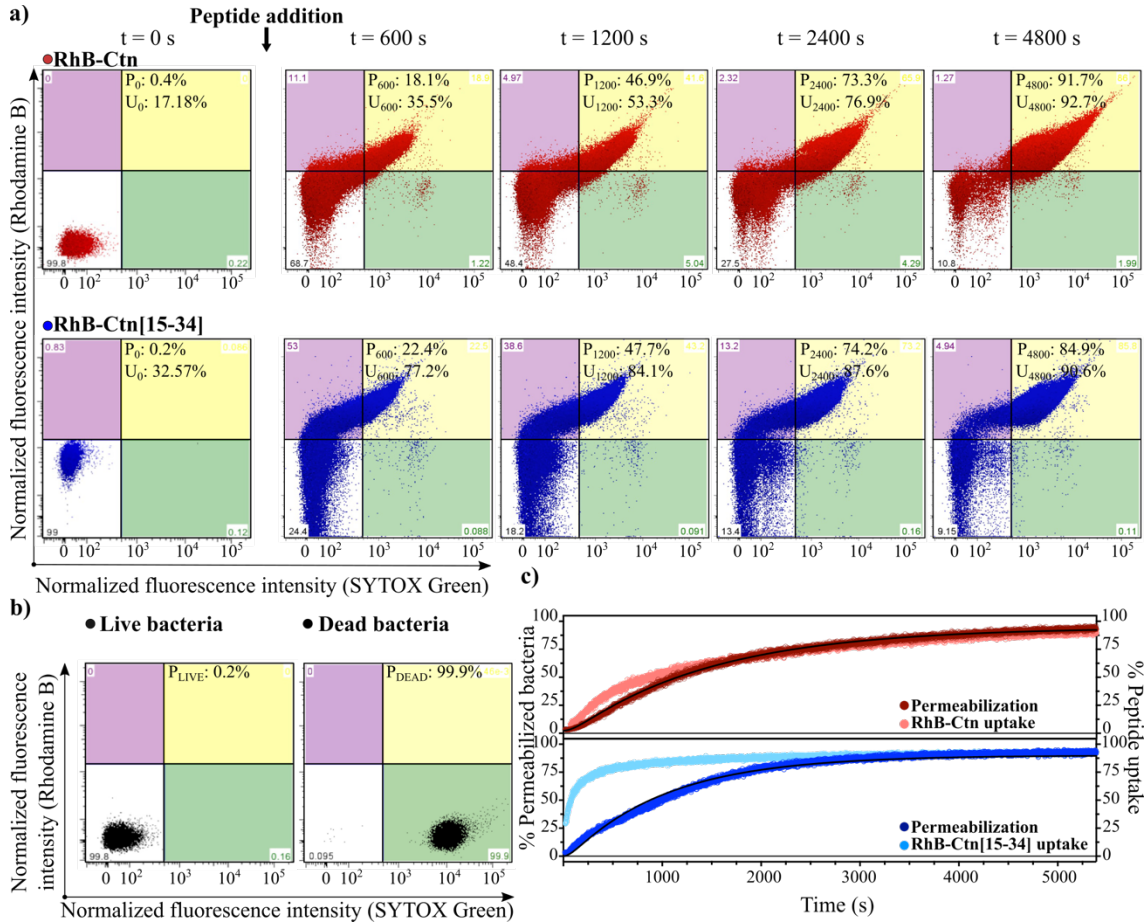

91 **FIGURE S5**

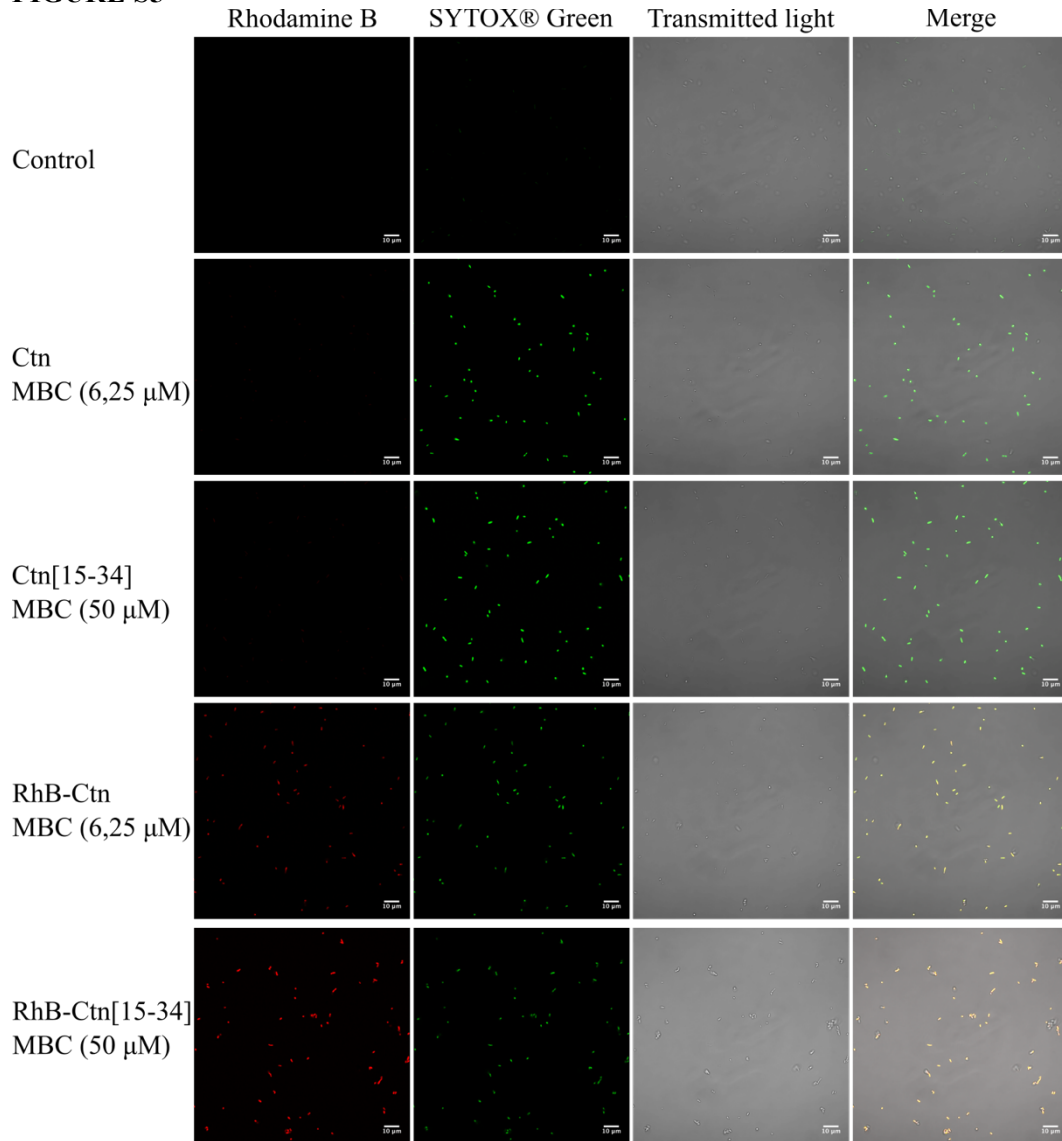

92  
93  
94

95 **FIGURE S6**

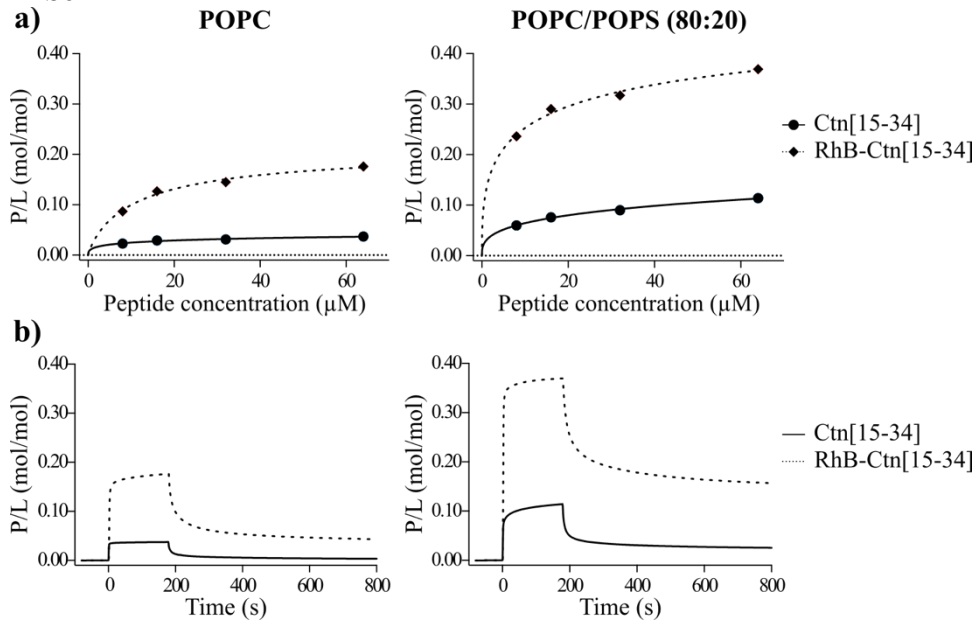

96  
97  
98



99 FIGURE S7

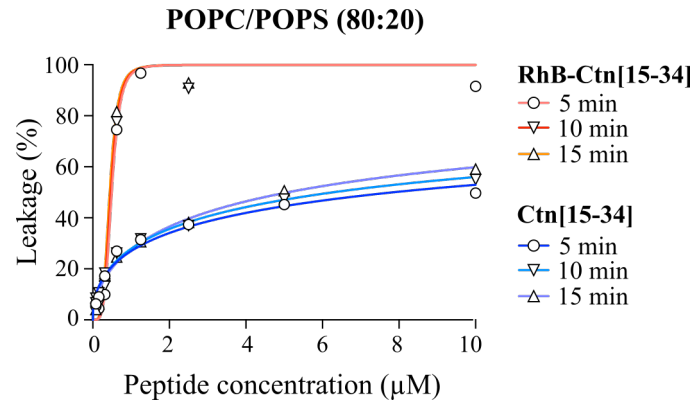

100  
101  
102

103 **FIGURE S8.**

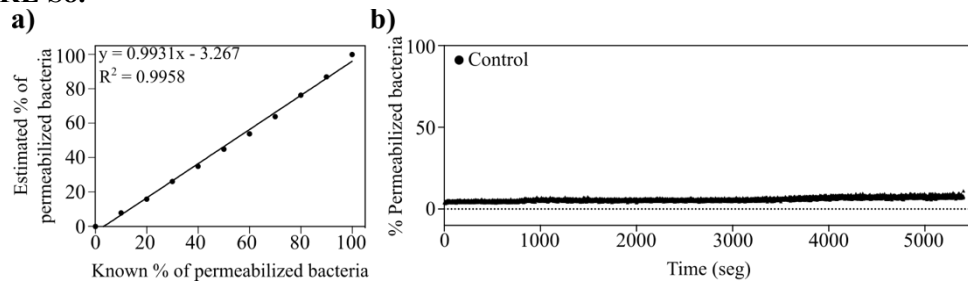

104  
105

106  
107  
108  
109  
110

**REFERENCES:**

1. Freire, J. M., Gaspar, D., de la Torre, B. G., Veiga, A. S., Andreu, D., and Castanho, M. A. (2015) Monitoring antibacterial permeabilization in real time using time-resolved flow cytometry. *Biochim Biophys Acta* **1848**, 554-560
